# Supplementary material for: Predicted Expenditure for Prescription Drugs for Multiple Sclerosis in the Italian Market Between 2023 and 2028: Results of the Oracle Project
Source: PubMed Central journal article supplement — Neurol Ther. 2024 Aug 2;13(5):1415–30. doi: 10.1007/s40120-024-00644-3 (PMC11393242; doi:10.1007/s40120-024-00644-3), 2024-08-02
Supplement: 40120_2024_644_MOESM1_ESM.pdf [file 40120_2024_644_MOESM1_ESM.pdf]

## Supplementary Material

# Predicted expenditure of prescription drugs for multiple sclerosis in the Italian market between 2023 and 2028: the results of Oracle Project

Damiano Paolicelli<sup>1</sup>, Giovanna Borriello<sup>2,3</sup>, Raffaella Clerici<sup>4</sup>, Elena Colombo<sup>5</sup>, Davide Croce<sup>6</sup>, Emanuele D'Amico<sup>7</sup>, Nicola De Rossi<sup>8</sup>, Alessia Di Sapio<sup>9</sup>, Giuseppe Fenu<sup>10</sup>, Davide Maimone<sup>11</sup>, Girolama A. Marfia<sup>12</sup>, Marcello Moccia<sup>13,14</sup>, Paola Perini<sup>15</sup>, Maria G. Piscaglia<sup>16</sup>, Lorenzo Razzolini<sup>17</sup>, Massimo Riccaboni<sup>18</sup>, Elisabetta Signoriello<sup>19</sup>, Gianluca Agostoni<sup>20</sup>, Alberto Farina<sup>20</sup>, Margaret Mondino<sup>20</sup>, Francesco Berruto<sup>21</sup>, Alessia Tettamanti<sup>21</sup>, Francesca Donnalaja<sup>21\*</sup>, Carla Tortorella<sup>22</sup>

\*Corresponding author

Francesca Donnalaja

IQVIA Solutions Italy S.r.l., Via Fabio Filzi, 29, 20124 Milano MI, Italy

Email: francesca.donnalaja@iqvia.com

<sup>1</sup> Department of Translational Biomedicines and Neurosciences, University of Bari Aldo Moro, Bari, Italy

<sup>2</sup> Multiple Sclerosis Center, San Pietro Fatebenefratelli Hospital, Rome, Italy

<sup>3</sup> Department of Public Health, Federico II University, Naples, Italy

<sup>4</sup> Operative Unit of Neurology, Valduce Hospital, Como, Italy

<sup>5</sup> Multiple Sclerosis Centre, IRCCS Mondino Foundation, Pavia, Italy

<sup>6</sup> Centre for Health Economics, Social and Health Care Management, University Carlo Castanea - LIUC, Castellanza, Italy

<sup>7</sup> Department of Medical and Surgical Sciences, University of Foggia, Foggia, Italy

<sup>8</sup> Multiple Sclerosis Center, ASST Spedali Civili di Brescia – P.O. Montichiari, Italy

<sup>9</sup> Department of Neurology and CRESM (Regional Referral Multiple Sclerosis Centre), University Hospital San Luigi Gonzaga, Orbassano, Italy

<sup>10</sup> Department of Neurology, Brotzu Hospital, Cagliari, Italy

<sup>11</sup> Centro Sclerosi Multipla, UOC Neurologia, Azienda Ospedaliera per l'Emergenza Cannizzaro, Catania, Italy

<sup>12</sup> Multiple Sclerosis Clinical and Research Unit, Department of Systems Medicine, Tor Vergata University, Rome, Italy

<sup>13</sup> Multiple Sclerosis Unit, Policlinico Federico II University Hospital of Naples, Naples, Italy <sup>14</sup> Department of Molecular Medicine and Medical Biotechnology, Federico II University of Naples, Italy

<sup>15</sup> Department of Neurology, Multiple Sclerosis Center, University of Padua, Padua, Italy

<sup>16</sup> Multiple Sclerosis Center, Santa Maria delle Croci Hospital, Ravenna, Italy

<sup>17</sup> Department of Neurofarba, University of Florence, Florence, Italy

<sup>18</sup> IMT School for Advanced Studies, Lucca, Italy

<sup>19</sup> Second Division of Neurology, Department of Advanced Medical and Surgical Sciences, University of Campania "Luigi Vanvitelli", Naples, Italy

<sup>20</sup> Sanofi Italy, Milan, Italy

<sup>21</sup> IQVIA Solutions Italy S.r.l., Milan, Italy

<sup>22</sup> Multiple Sclerosis Center, Department of Neurosciences, San Camillo-Forlanini Hospital, Rome, Italy

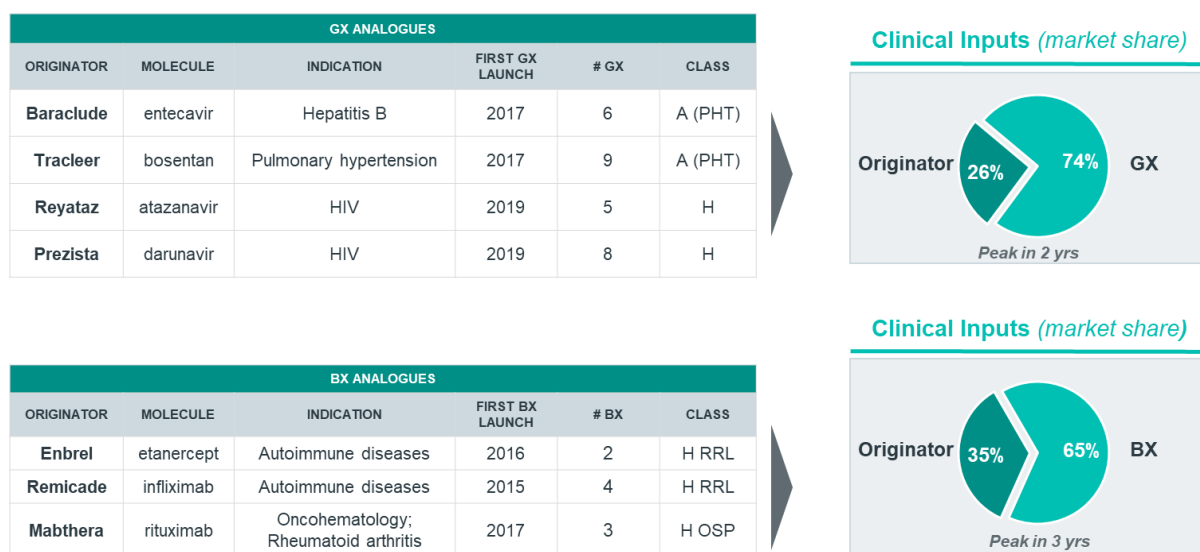

*Supplementary Figure 1. Selected analogues for evaluation of generics and biosimilars penetration on the left and analysis results on the right. Analogues were selected among products indicated in a chronic therapeutic area with the same reimbursement class (A or H) and distribution channel as multiple sclerosis (MS) products.*

| GX ANALOGUES     |            |                        |                 |      |         |
|------------------|------------|------------------------|-----------------|------|---------|
| ORIGINATOR       | MOLECULE   | INDICATION             | FIRST GX LAUNCH | # GX | CLASS   |
| <b>Baraclude</b> | entecavir  | Hepatitis B            | 2017            | 6    | A (PHT) |
| <b>Tracleer</b>  | bosentan   | Pulmonary hypertension | 2017            | 9    | A (PHT) |
| <b>Reyataz</b>   | atazanavir | HIV                    | 2019            | 5    | H       |
| <b>Prezista</b>  | darunavir  | HIV                    | 2019            | 8    | H       |

#### Economic Inputs (price cut)

**- 89%** discount applied to Gx vs originator pre-LoE ex-factory price (reached in 1 year)

**- 70%** discount applied to originator after Gx launch (reached in 2 years)<sup>^</sup>

| BX ANALOGUES    |            |                                         |                 |      |       |
|-----------------|------------|-----------------------------------------|-----------------|------|-------|
| ORIGINATOR      | MOLECULE   | INDICATION                              | FIRST BX LAUNCH | # BX | CLASS |
| <b>Enbrel</b>   | etanercept | Autoimmune diseases                     | 2016            | 2    | H RRL |
| <b>Remicade</b> | infliximab | Autoimmune diseases                     | 2015            | 4    | H RRL |
| <b>Mabthera</b> | rituximab  | Oncohematology;<br>Rheumatoid arthritis | 2017            | 3    | H OSP |

#### Economic Inputs (price cut)

**- 72%** discount applied to Bx vs originator pre-LoE ex-factory price (reached in 3 years)

**- 41%** discount applied to originator after Bx launch (reached in 3 years)

*Supplementary Figure 2. Selected analogs for evaluation of generics, biosimilars and originators tender discounts on the left and analysis results on the right. Analogs were selected among products indicated in a chronic therapeutic area with the same reimbursement class (A or H) and distribution channel as multiple sclerosis (MS) products.*

*RRL: Limited Repeated Prescription; OSP: Hospital use only.*

**Total expenditure reduction between 2022 and 2028  
(Baseline: €170 Millions)**

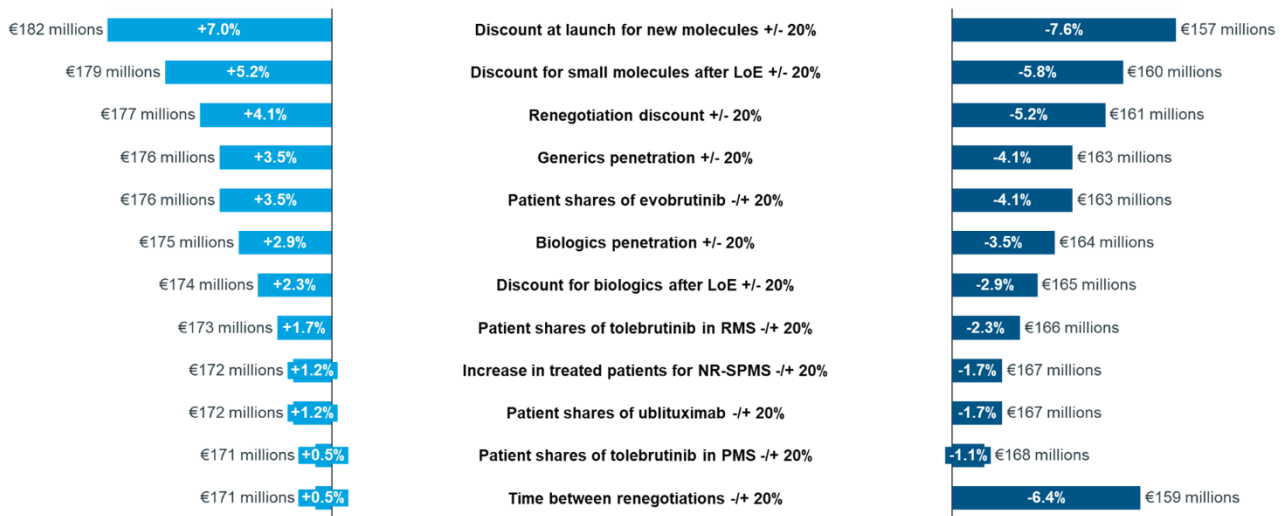

*Supplementary Figure 3. Results of the sensitivity analysis conducted on the model. The variable considered was the total expenditure reduction between 2022 and 2028, equal to €170 mln. All parameters have been varied considering a +/- 20% variation of baseline values.*

*LoE: loss of exclusivity; NR-SPMS: non-relapsing secondary progressive multiple sclerosis; PMS: progressive multiple sclerosis; RMS: relapsing multiple sclerosis.*
